# Supplementary material for: Integrating social care into gynecologic oncology: Identifying and addressing patient’s social needs
Source: PubMed Central journal article supplement — Gynecol Oncol. Author manuscript; Available in PMC 2024 Jul 2. (PMC11218889; doi:10.1016/j.ygyno.2023.11.001), 2023-11-18
Supplement: NIHMS1991060-supplement-Supplementary_Material.pdf [file NIHMS1991060-supplement-Supplementary_Material.pdf]

## Cancer Care - Social Needs Screening Tool

Dear patient,

Your care team welcomes you. Please answer the following questions to allow us to better support you. There are no wrong answers. Your responses are completely confidential and do not affect your benefits.

|                                                                                                                      |                                                                                                                                   | Circle One              |                   |
|----------------------------------------------------------------------------------------------------------------------|-----------------------------------------------------------------------------------------------------------------------------------|-------------------------|-------------------|
|                                     | In the last 12 months, did you ever eat <b>less than you felt you should</b> because there wasn't enough money for food?          | Yes                     | No                |
|                                     | In the last 12 months, has the <b>electric, gas, oil, or water company threatened to shut off</b> your services in your home?     | Yes                     | No                |
|                                     | Are you worried or concerned that in the next two months you <b>may not have stable housing</b> ?                                 | Yes                     | No                |
|                                     | Has <b>lack of transportation</b> kept you from medical appointments or from doing things needed for daily living?                | Yes                     | No                |
|                                     | Do <b>problems getting childcare</b> make it difficult for you to work or go to the hospital?                                     | Yes                     | No                |
|                                   | In the last 12 months, have you needed to see a doctor or get treatment but <b>could not because of fear of losing your job</b> ? | Yes                     | No                |
|                                   | In the last 12 months, have you been <b>physically or emotionally hurt</b> or felt threatened?                                    | Yes                     | No                |
|                                   | I often feel like I <b>lack companionship</b> .                                                                                   | Yes                     | No                |
|                                   | How would you rate your <b>ability to read</b> ?                                                                                  | Very Poor<br>Poor<br>OK | Very Good<br>Good |
|                                   | I <b>would like to speak with a Social Worker</b> .                                                                               | Yes                     | No                |
| Are any of your <b>needs urgent</b> ? For example: I don't have food tonight, I don't have a place to sleep tonight. |                                                                                                                                   | Yes                     | No                |
| Would you <b>like help</b> with any of these <b>needs</b> ?                                                          |                                                                                                                                   | Yes                     | No                |

Screening tool NOT to be scanned in Orchid  
Please return to Cancer Care Navigation Folder in Clinic D

*PLACE PATIENT STICKER HERE*

## Atención del cáncer: herramienta de detección de necesidades sociales

Estimado paciente:

Su equipo de atención le da la bienvenida. Responda las siguientes preguntas para que podamos brindarle un mejor apoyo. No hay respuestas equivocadas. Sus respuestas son completamente confidenciales y no afectan sus beneficios.

|                                                                                                                               |                                                                                                                                            | Círculo Uno                                 |                    |
|-------------------------------------------------------------------------------------------------------------------------------|--------------------------------------------------------------------------------------------------------------------------------------------|---------------------------------------------|--------------------|
|                                              | En los últimos 12 meses, <b>¿comió menos de lo que creía que necesitaba</b> porque no le alcanzaba el dinero para la comida?               | Si                                          | No                 |
|                                              | En los últimos 12 meses, <b>¿le cortó una compañía un servicio público</b> por no pagar sus cuentas?                                       | Si                                          | No                 |
|                                              | ¿Le preocupa quedarse <b>sin vivienda estable</b> en los próximos dos meses?                                                               | Si                                          | No                 |
|                                              | <b>¿La falta de transporte</b> le ha impedido asistir a las citas médicas o hacer las cosas necesarias para la vida diaria?                | Si                                          | No                 |
|                                             | ¿Los <b>problemas para conseguir cuidado infantil</b> le dificultan trabajar o ir al hospital?                                             | Si                                          | No                 |
|                                            | En los últimos 12 meses, <b>¿ha necesitado ver a un médico o recibir tratamiento</b> , pero no pudo hacerlo por temor a perder su trabajo? | Si                                          | No                 |
|                                            | En los últimos 12 meses, <b>¿ha sido herido física o emocionalmente</b> o se ha sentido amenazado?                                         | Si                                          | No                 |
|                                            | A menudo siento que me <b>falta compañía</b> .                                                                                             | Si                                          | No                 |
|                                            | ¿Cómo calificaría su <b>capacidad para leer</b> ?                                                                                          | Muy deficiente<br>Deficiente<br>Mas o Menos | Muy Buena<br>Buena |
|                                            | Me gustaria hablar con una <b>trabajadora social</b> .                                                                                     | Si                                          | No                 |
| ¿Es <b>urgente</b> alguna de estas necesidades? Por ejemplo: No tengo qué comer esta noche, no tengo dónde dormir esta noche. |                                                                                                                                            | Si                                          | No                 |

Screening tool NOT to be scanned in Orchid  
Please return to Cancer Care Navigation Folder in Clinic D

PLACE PATIENT STICKER HERE
